1  
2  
3  
4  
5  
6  
7  
8  
9  
10  
11  
12  
13  
14  
15  
16  
17  
18  
19  
20

## **Whole-proteome Tree of Insects: Grouping and phylogeny without sequence alignment**

JaeJin Choi<sup>1,2</sup>, Byung-Ju Kim<sup>3</sup>) & Sung-Hou Kim<sup>1,2,3,#</sup>)

<sup>1</sup>Department of Chemistry and Center for Computational Biology, University of California, Berkeley, CA, 94720, USA, <sup>2</sup> Biological Systems and Engineering Division, and Molecular Biophysics & Integrated Bioimaging Division, Lawrence Berkeley National Laboratory, Berkeley, CA 94720, USA, and <sup>3</sup>Human Genome Research Center, Incheon National University, Incheon, Republic of Korea (South Korea)

ORCID: JJ Choi (0000-0002-2860-9606), BJ Kim (0000-0002-8906-5622), SH Kim (0000-0002-7293-5994)

#Corresponding author: Sung-Hou Kim; [sunghou@berkeley.edu](mailto:sunghou@berkeley.edu); 510-708-2564

419 Latimer Hall, University of California, Berkeley CA, 94720, USA

e-mail addresses of co-authors: JJC ([jaejinchoi@berkeley.edu](mailto:jaejinchoi@berkeley.edu)); BJK ([bjk@inu.ac.kr](mailto:bjk@inu.ac.kr))

Short running title: **Whole-Proteome Tree of Insects**

**Keywords:** Organism tree, Gene/protein tree, Feature Frequency Profile, Jensen-Shannon divergence, Evolutionary progression scale, Cumulative genomic divergence, Arthropodal burst

21 **Abstract**

22

23 An “organism tree” of insects, the largest and most species-diverse group of all  
24 living animals, can be considered as a conceptual tree to capture a simplified narrative of  
25 the complex evolutionary courses of the extant insects. Currently, the most common  
26 approach has been to construct a “protein tree”, as a surrogate for the organism tree, by  
27 Multiple Sequence Alignment (MSA) of highly homologous regions of a set of select  
28 proteins to represent each organism. However, such selected regions account for a very  
29 small fraction of the whole-proteome of each organism.

30 Information Theory provides a method of comparing two sets of *all* proteins, two  
31 whole-proteomes, without MSA: By treating each whole-proteome sequence as a “book”  
32 of amino acid alphabets, the information contents of two whole-proteomes can be  
33 quantitatively compared using the text comparison method of the theory, without sequence  
34 alignment, providing an opportunity to construct a “whole-proteome tree” of insects as a  
35 surrogate for an organism tree of insects.

36 A whole-proteome tree of the insects in this study shows that: (a) all the  
37 founders of the major groups of the insects have emerged in an explosive “burst” near  
38 the root of the tree, (b) the most basal group of all the insects is a subgroup of  
39 Hemiptera consisting of aphids and psyllids, and (c) there are other notable  
40 differences in the phylogeny of the groups compared to those of the recent protein  
41 trees of insects.

42

## 43 **Introduction**

44

45 *Sequence-alignment-based “protein trees”*: An “organism tree” of insects can be  
46 considered as a practically useful narrative to convey a simplified evolutionary  
47 relationship among the insects. However, it is a conceptual tree that cannot be  
48 experimentally validated. Thus, it is expected that the effort will continue to find one or  
49 more “surrogate trees” derived from various descriptors of the characteristics associated  
50 with each insect and to find improved methods to estimate evolutionary distances from  
51 the divergence of the descriptors under as few subjective assumptions as possible at the  
52 time of investigation.

53 At present, the best descriptor of an insect as an organism is its entire whole-  
54 genome sequence information, from which whole-proteome sequence can be derived.  
55 However, for several decades, due to the technical difficulties and high cost of whole  
56 genome sequencing, and to the difficult task of comparing unaligned sequences, the most  
57 practically feasible and common approach to construct a surrogate tree has been to  
58 construct a Multiple Sequence Alignment (MSA)-based “protein tree” under a few  
59 important, but debatable assumptions: (a) a set of regions with high homology selected  
60 among each of homologous proteins may have enough information to represent a whole  
61 organism, and (b) the divergence of certain characteristics, most commonly, point  
62 substitution rates within each MSA aligned-regions may be a reasonable measure to  
63 represent the evolutionary divergence/distances among the whole organisms, without  
64 considering possible evolutionary roles of all other proteins without high homologous

65 regions among them and of other mutational events including absence/presence of  
66 proteins.

67 Such “alignment-based” protein trees represent the evolutionary phylogeny of the  
68 selected regions of the selected proteins, but not full characteristics of all proteins, let  
69 alone the whole organisms, because the aligned regions account, in general, for a very  
70 small fraction of all proteins (Pace 2009).

71

72 ***Information-theory-based (“alignment-free”) “whole-proteome trees”:*** This situation  
73 has since changed significantly in two important aspects: (a) During last decades, a large  
74 number (over 134 species, mostly insects, as of 2020) of whole-genome sequences of  
75 extant insect species have been accumulating in public databases, and (b) Information  
76 Theory, developed to analyze linear electronic signals, was found to be adaptable to  
77 analyze other linear information, such as natural languages and genomic information,  
78 without sequence alignment (“alignment-free”) (Zielezinski et al. 2017; Blaisdell 1986).

79 In this approach, the whole content, not selected portions of the whole content, of a whole-  
80 proteome sequence, can be described by “ $n$ -Gram” or “ $k$ -mers” (Zielezinski et al. 2017).

81  $N$ -Gram of a whole-proteome is the collection of all overlapping short subsequences of  
82 length  $n$ , and it contains all information necessary to reconstruct the original sequence.

83 Furthermore, the information divergence (difference) between two  $n$ -Grams can be  
84 estimated by, for example, Jensen-Shannon divergence (JSD) without alignment of the  
85 whole proteome sequences (Lin 1991). Such approach has been widely tested and  
86 validated for comparing texts and books of natural languages for latent semantic analysis

87 since 1990s (Deerwester et al. 1990) and gene sequences consisting of coding and non-  
88 coding regions as well as amino acid sequences since 1986 (Blaisdell 1986).

89           Some of these validated methods have been adapted and optimized to handle  
90 whole-proteome sequences in Feature Frequency Profile (FFP) method (Sims et al. 2009).  
91 Since there is no “golden standard” for a phylogenetic evolutionary tree of a group of  
92 organisms that can be experimentally validated, the FFP method has been tested using 26  
93 books in English alphabets from diverse authors and genres, after removing all spaces and  
94 delimiters as well as author names, book titles, headers, footers, etc. In general, the  
95 method performed well in grouping the “books” by the genre and authors (see Fig. 1 of  
96 Sims et al. 2009). In a recent bench-marking studies of 24 Alignment-free methods, FFP  
97 method was ranked among the top 5 best-performing tools for phylogeny prediction based  
98 on the input data of assembled whole genome sequences (Zielezinski et al. 2019).

99           In the FFP method, whole-genome/whole-proteome information is used under the  
100 assumptions very different from the protein trees: (a) whole-proteome sequence of an  
101 organism represents the organism better than the collection of short regions of highly  
102 homologous sequence from a set of selected genes/proteins used in the protein trees and  
103 (b) a combination of *all types of mutations*, such as point substitution, insertion/deletion of  
104 various length, recombination, duplication, transfer or swapping of genes etc., contribute  
105 to the evolutionary processes of the organisms, rather than only point substitution rates in  
106 the protein trees. Thus, whole-proteome tree may provide an independent view of the  
107 evolutionary relationship among the insect organisms.

108

109 *Experiences from earlier whole-proteome trees:* In the last decade, we have tested and  
110 optimized the protocols for building whole-proteome trees using various different  
111 populations such as Bacteria and Archaea Domains (Jun et al. 2010), Fungi Kingdom  
112 (Choi & Kim 2017) and, most recently, all three Domains at a deep phylogenic level  
113 (Choi & Kim 2020). From these studies we have learned that: (a) among three types of  
114 the trees (whole-genome DNA tree, whole-transcriptome RNA tree, and whole-proteome  
115 amino-acid tree) the whole-proteome trees produce the most topologically stable trees; (b)  
116 for a give group of organisms, the optimal length of the sequence strings to be used in FFP  
117 method can be empirically determined; and (c) cumulative genomic divergence (CGD) is  
118 a useful and computable quantity for the point of the emergence for the founders of a  
119 group in the “evolutionary progression scale”.

120 In this study, we optimized various parameters and protocols specifically for the  
121 population of insects and present a view of the whole-proteome tree based on whole-  
122 proteome sequences of 134 diverse arthropod species (123 insects plus 11 non-insect  
123 arthropods), available in the NCBI database (O’Leary et al. 2016), and discuss its  
124 implications to phylogenic aspects of insect evolution.

125

## 126 **Results**

127

128 To compare the current protein trees with our whole-proteome Tree of Insects  
129 (ToIn) we chose two recent and very comprehensively-analyzed protein trees: The first  
130 one is the recent “alignment-based” tree of 144 insect taxa based on 1,478 single-copy

131 protein-coding nuclear genes (Fig. 1 of Misof et al. 2014). The second is the tree for 76  
132 arthropod taxa (Fig. 2 of Thomas et al. 2020) based on up to 4,097 single copy protein-  
133 coding genes. In both cases, the number of aligned genes used are a small fraction of  
134 about 10,000 to 31,000 genes among their study insects. Both protein trees agree with  
135 each other, in general, on the branching order of the Order groups of the respective  
136 populations, and on similar time spread of the emergence of the founders of the groups in  
137 chronological time scale estimated based on available fossils and calibration methods  
138 under various assumptions.

139 In comparing our whole-proteome ToIn to these two protein trees, we focus on  
140 two aspects separately: grouping patterns and phylogeny of the groups. For the former,  
141 we use two methods: First, we cluster our study population by several unsupervised  
142 clustering algorithms using only the distances estimated from the “divergence” among  
143 whole-proteome FFPs with no explicit constraints of the presence of the common  
144 ancestor(s) or specific evolutionary models (see Construction of whole-proteome Tree of  
145 Insects in Materials and Methods). We then ask whether the “clustering pattern” is  
146 similar to the “clading pattern” in the protein trees and in our whole-proteome ToIn,  
147 recognizing that the both tree constructions assume the constrains of the common  
148 ancestor(s) and specific evolutionary models. For the phylogeny of the groups, we  
149 compare the order of branching of the groups and their emergence points on the  
150 evolutionary progression scale in our tree and in chronological scale in the protein trees  
151 (see “Cumulative Genomic Divergence (CGD)” as “Evolutionary Progression Scale” in  
152 Materials and Methods).

153

154 *A. Demographic grouping pattern by clustering and clading*

155 **Clustering:** We have tested the grouping pattern of the insects by several  
156 unsupervised clustering algorithms, such as Principal Component Analysis (PCA), Multi-  
157 Dimensional Scaling, and t-Distributed Stochastic Neighbor Embedding (t-SNE) (R Core  
158 Team 2016; v.d. Maaten & Hinton 2008), all of which can be accomplished from the  
159 same starting “distance” matrix constructed using the divergence of whole-proteome  
160 sequences, as calculated by JSD (Lin 1991) of FFPs, among all pairs of the study  
161 organisms. All three clustering methods showed the clustering pattern compatible with  
162 the current grouping of arthropods with common and scientific names, mostly based on  
163 morphological characteristics. Figure 1, a classical PCA clustering, which is very similar  
164 to that of MDS method, shows that all our study population are distributed into 5  
165 “spokes”. Two long spokes (IV and V) corresponds to all the members of Diptera and  
166 Hymenoptera of Insecta Class, respectively. The remaining three short spokes (I, II, and  
167 III) correspond to: Members of Chelicerata and Crustacea of non-insect arthropods in  
168 spoke I; those of Hemiptera-A and Lepidoptera of Insecta Class in spoke II, and those of  
169 Hemiptera-B, Coleoptera, and Blattodea of Insecta Class in spoke III. The most  
170 noticeable difference with the grouping in the current protein trees (Misof et al. 2014;  
171 Thomas et al. 2020) is that Hemiptera is split into two separate groups, labeled in this  
172 study as Hemiptera-A and -B. Another clustering by t-SNE (see Supplemental  
173 information, Fig. S1) also shows a similar split of Hemiptera into two, which is  
174 unexpected, because the assumptions and algorithms in t-SNE and PCA are completely  
175 different.



176                   **Clading:** As a second method of the grouping, we use the clading pattern of the  
177 organisms in our whole-proteome ToIn. Figure 2 shows the topology of the ToIn,  
178 constructed using Neighbor-Joining method implemented in BIONJ (Saitou & Nei 1987;  
179 Gascuel 1997). In this study, we use the divergence of whole-proteome sequences of two  
180 organisms as the estimates for the evolutionary distances between them, as calculated by  
181 JSD of pair-wise FFPs at an optimal Feature length (see Construction of whole-proteome  
182 Tree of Insects in Materials and Methods and Supplementary information Fig. S2). We  
183 also assume an evolutionary model of Maximum Parsimony (minimum evolution) in a  
184 way that the chosen neighbors to be joined are those that minimize the total sum of  
185 branch-lengths at each stage of step-wise joining of neighbors starting from a star-like  
186 tree (Saitou & Nei 1987). The tree shows that most of the clusters in Fig.1 can be  
187 identified among the clades in the ToIn.

188                   **Robustness of grouping:** The grouping pattern by clustering *and* clading in our  
189 study agrees well with those of the protein trees (Misof et al. 2014; Thomas et al. 2020)  
190 except for Hemiptera group (see Notable differences in grouping and phylogenic  
191 positions in Discussions and Implications). Thus, it is surprising that the demographic  
192 grouping pattern is robust, in general, regardless of not only the information type (select  
193 protein-characteristics, or whole-proteome characteristics), but also of the methods  
194 (clustering or clading) used in grouping. For an implication of this result, see Similarities  
195 in grouping patterns in Discussion and Implications. However, not surprisingly, there  
196 are significant differences from the protein trees (Misof et al. 2014; Thomas et al. 2020)  
197 in branch-length and branching order of the groups (see Dissimilarities in branching  
198 orders and branch-lengths in Discussions and Implications).

199

200

201 ***B. Emergence of the “Founders” of all major groups in a staged “burst”***

202 For the following results we define “Cumulative Genomic Divergence (CGD)”  
203 for an internal node of the ToIn as the cumulative scaled-branch-length from the tree root  
204 to the node (see Cumulative Genomic Divergence (CGD) as “Evolutionary Progression  
205 Scale” in Materials and Methods) to represent the extent of the “evolutionary progression”  
206 of the node. The progression is scaled such that the root node of ToIn is set at  $CGD = 0$   
207 (see Outgroup in Discussions and Implications) and the leaf nodes of the extant organisms  
208 at  $CGD = 100$ , on average.

209 **“Arthropodal burst” near the root of ToIn:** Figures 3, 4 and 5 show the  
210 whole-proteome tree with CGD values. They reveal that the “founders” (for definition,  
211 see Supplemental information, Fig. S3) of all major groups of insects as well as non-  
212 insect arthropods (at Subphyla and Order levels) emerged in a staged burst within a short  
213 evolutionary progression span between CGD of 1.6 and 5.8 (marked by a small red arc in  
214 Figs. 3A and 3B), near the root of the tree. This observation is dramatically different  
215 from those of the protein trees (Misof et al. 2014; Thomas et al. 2020), where the  
216 founders of the major groups of all arthropods emerged throughout a long time-span of  
217 chronological scale.

218 **A subgroup of Hemiptera (Hemiptera-A) is the most basal group of all**  
219 **Insecta:** The first founders of Class Insecta to emerge is the founders of Hemiptera-A  
220 group (aphids and a psyllid) at CGD of about 3.7 (Figs. 3A, 3B). This is in stark contrast

221 to the protein trees, where all Hemiptera is the sister to Thysanoptera (thrips) (Misof et al.  
222 2014) or a group of all Hemiptera, thrips and human louse is the sister to all other large  
223 groups of insects except Blattodea group (Thomas et al. 2020) (see also Notable  
224 differences in grouping and phylogenic positions in Discussions and Implications).

225 **Order of emergence of the “founders” of all major groups of Insecta:** Figure  
226 4 shows a series of staged emergence of the founders of all major groups of Insecta.  
227 After the most basal group of Hemiptera-A group (aphids and a psyllid) at CGD of  
228 around 3.7, the founders of Diptera group emerged at CGD of 4.1, and those of the  
229 remaining five Order-level groups (Lepidoptera, Hemiptera-B (bugs, a planthopper and a  
230 whitefly), Coleoptera, Blattodea + a thrips, and Hymenoptera groups) at CGD of 4.4, 4.8,  
231 5.2, 5.8, and 5.8, respectively. For possible implications see Notable differences in  
232 grouping and phylogenic positions in Discussions and Implications below)

233

## 234 **Discussions and Implications**

235

236 ***Similarities in grouping patterns:*** As mentioned earlier, it is surprising that the grouping  
237 patterns at Order level between the protein trees (Misof et al. 2014; Thomas et al. 2020)  
238 and our whole-proteome ToIn are very similar (see below for one notable exception of  
239 Hemiptera) despite the facts that the types of input data (multiple-aligned regions of  
240 selected proteins vs. whole-proteome) and estimation methods for evolutionary distance  
241 used (based on point mutational rates vs. whole genomic divergences) are very different.  
242 A possible implication is that, after the “burst”, the members of each group evolved

243 largely “isolated” within the group without significant genomic mixing between the  
244 groups, thus, resulting in much smaller genomic variation within the group than between  
245 the groups, as manifested by mostly isolated clusters.

246

247 ***Dissimilarities in branching orders and branch-lengths:*** It is not surprising that the  
248 branching orders and branch-lengths are not similar between the protein trees (Misof et al.  
249 2014; Thomas et al. 2020) and our whole-proteome tree, because the assumptions under  
250 which the estimations for evolutionary distances among the organisms are calculated are  
251 very different: in the protein trees, the distances are calculated only for the aligned  
252 portions of the selected genes using, e.g., point-substitutional mutation rates, while in our  
253 tree they are calculated by accounting presence/absence of all amino acid short strings,  
254 Features, for all proteins due to all types of mutations.

255

256 ***Evolutionary progression scale vs. Chronological time scale:*** It is difficult to design a  
257 scale that quantitatively measures the degree of evolutionary progression, because it is not  
258 clear what characteristics of an organism can best reflect the progression and also are  
259 quantitatively measurable. Since we are using whole-proteome sequence to represent each  
260 organism, we use the divergence of the whole-proteome sequences as the evolutionary  
261 progression scale (Choi & Kim 2020). In contrast to linear chronological time scale, the  
262 evolutionary progression scale is most likely not strictly linear, because any significant  
263 geological and ecological events may accelerate or decelerate the evolutionary progression  
264 for a given organism. However, the direction of arrows in both scales are the same,  
265 suggesting that the two scales may be calibrated when sufficient fossils, other independent

266 records, and improved calibration methods become available (see Cumulative Genomic  
267 Divergence (CGD) as “Evolutionary Progression Scale” in Materials and Methods).  
268 Meanwhile, we use the evolutionary progression scale to compare the order of emergence  
269 of the founders of various major groups under the assumption that the whole-proteome  
270 sequence divergence can be considered as informational entropy, which increases as  
271 evolution progresses, similar to the physical entropy of universe increases as the universe  
272 evolve.

273

274 **“Burst” vs. Gradual emergence of the founders of major groups:** While cognizant of  
275 the difference and similarity of the two scales, the most dramatic difference is observed in  
276 the span of the scales within which the founders of all major groups at Order level  
277 emerged in the protein trees (Misof et al. 2014; Thomas et al. 2020) and in our whole-  
278 proteome ToIn: In the protein trees, the founders of all the groups at Order level emerged  
279 gradually during a long chronological time span of about 350 Million years (Myrs)  
280 corresponding roughly 60% of about 570 Myrs between the tree root to the extant  
281 arthropods (Fig. 1 of Misof et al. 2014), or about 210 Myrs corresponding to roughly 37%  
282 of the same full chronological scale (Fig. 2 of Thomas et al. 2020). In drastic contrast, the  
283 founders of all the major groups in our tree emerged within about 4% of the full  
284 evolutionary progression scale in a sudden burst (“Arthropodal burst”; see Figs. 3A and  
285 3B) near the root of our whole-proteome tree. This drastically contrasting observations  
286 between the two types of trees may have an important qualitative evolutionary implication  
287 in constructing the narrative for the birth of the insect diversity.

288

289 **Notable differences in grouping and phylogenetic positions:** Despite the drastic difference  
290 in the emergence pattern of the founders (burst vs. gradual) mentioned above, the order of  
291 emergence of the major groups at Order and Subphylum levels agree between the two  
292 protein trees (Misof et al. 2014; Thomas et al. 2020) and our whole-proteome tree with  
293 some notable differences in Hemiptera and Blattodea as described in Results above.  
294 These differences may get resolved once the whole-genome sequences of many more  
295 relevant organisms become available. At present, we suggest some possible implications  
296 as described below:

297 **Hemiptera:** As mentioned earlier, in our whole-proteome ToIn (Figs. 3A and  
298 3B) as well as in PCA (Fig. 1) and t-SNE (Supplemental Fig. S1) clustering plots,  
299 Hemiptera is divided into two separate clades/clusters, which we call Hemiptera-A  
300 (“primitive” Hemiptera, such as aphids and a psyllid) and Hemiptera-B (“bugs” such a  
301 planthopper, a whitefly, a stink bug and a bed bug), and their phylogenetic positions are  
302 very far apart (see Figs. 2, 3 and 5): Hemiptera-A at the basal position of all Insecta and  
303 Hemiptera-B as sister to the group consisting of Lepidoptera, Coleoptera and  
304 Hymenoptera. But, in the protein trees (Misof et al. 2014; Thomas et al. 2020) the both  
305 groups form a single clade, and is at basal or sister to all other large groups of insects  
306 except Blattodea group. This difference in clustering and phylogenetic positioning  
307 suggest that, when viewed at whole-proteome level, which includes *both* homologous and  
308 non-homologous proteins, the members are more similar within each subgroup than  
309 between the two subgroups in our tree. But, when viewed, as in the protein trees, only  
310 for the select homologous proteins in the *absence* of the non-homologous proteins, which

311 are the overwhelming majority of the all proteins, they are similar among all of them to  
312 form only one clade.

313 **Blattodea:** Two termites (Blattodea) and one thrips (Thysanoptera), both eusocial  
314 and hemimetabolous, form a clade in our whole-proteome ToIn and the clade is sister (or  
315 basal) to Hymenoptera group, which is also eusocial but holometabolous (see Fig. 5).  
316 However, in one protein tree (Misof et al. 2014), Blattodea group (cockroaches and  
317 termites, which are eusocial and hemimetabolous) is a member of a larger clade  
318 Polyneoptera and placed at the basal position to all other Order groups of Insecta, which  
319 are largely non-social and hemi- or holo-metabolous, while, in the other protein tree  
320 (Thomas et al. 2020), Blattodea group forms a separate clade, and is placed near the basal  
321 position of all other Order groups of Insecta. This is in contrast to what we observe in our  
322 ToIn, where Hemiptera-A, is the basal group of Insecta.

323

324 **Outgroup:** Since our method does not require multiple sequence alignment, we  
325 constructed, as was described in our earlier works on whole-proteome trees (Jun et al.  
326 2010; Choi & Kim 2017; Choi & Kim 2020), the proteome sequence of an “artificial  
327 (faux) arthropod” by “shuffling” (Knuth 1973; Fisher & Yates 1948) the alphabets of the  
328 whole proteome sequence of an organism in the study group. We used two such artificial  
329 arthropods (named R28612 and r12957) to form the outgroup for this study. Each has the  
330 same size and amino acid composition of corresponding protein of an extant arthropod,  
331 but does not have gene sequences information for the organism’s survival.

332

333

334

## 335 **Materials and Methods**

336

### 337 *Sources and selection of proteome sequences*

338 We downloaded the proteome sequences for 134 arthropods from NCBI RefSeq  
339 DB using NCBI FTP depository (O’Leary et al. 2016). Protein sequences derived from  
340 all organelles were excluded from this study. Also excluded from our study are those  
341 derived from whole genome sequences assembled with “low” completeness based on two  
342 criteria: (a) the genome assembly level indicated by NCBI as “contig” or lower (i.e. we  
343 selected those with the assembly levels of ‘scaffold’, ‘chromosome’ or ‘complete  
344 genome’), and (b) the proteome size smaller than 80% of the smallest proteome size  
345 among highly assembled arthropod genomes (*Anopheles gambiae str. PEST* with 14,089  
346 proteins at “chromosome” assembly level; TaxID 180454).

347 All taxonomic names and their taxon identifiers (TaxIDs) of the organisms in this  
348 study are from NCBI taxonomy database, and listed in Supplementary Information,  
349 Dataset S1.

350

### 351 *Construction of whole-proteome Tree of Insects*

352 Based on our earlier experiences of constructing whole-proteome trees of  
353 prokaryotes (Jun 2010), fungi (Choi & Kim 2017) and all life forms (Choi & Kim 2020)  
354 by Feature Frequency Profile (FFP) method (Sims et al. 2009), following choices have



355 been made to obtain a topologically stable whole proteome ToIn of maximum parsimony  
356 (minimum evolution) by BIONJ (Saitou & Nei 1987): a) Among three types of genomic  
357 information (DNA sequence of the whole genome, RNA sequence of whole  
358 transcriptome and amino acid sequence of whole proteome) whole-proteome trees are  
359 most “topologically stable” as estimated by Robinson-Foulds metric (Robinson &Foulds  
360 1981) at respective “optimal Feature-length”; b) For FFP as the “descriptor” of the whole  
361 proteome of each organism, the optimal Feature-length is about 10 amino-acid string (see  
362 Supplementary Information, Fig. S2); and c) Jensen-Shannon Divergence (JSD) (Lin  
363 1991) is an appropriate measure of “divergence of information content”, as the measure  
364 of dissimilarity between two whole-proteome descriptors, for constructing the distance  
365 matrix of BIONJ (Saitou & Nei 1987; Gascuel 1997). It is important to note that such  
366 FFP of a whole-proteome sequence of an organism has all the information necessary to  
367 reconstruct the original whole proteome sequence.

368

369 ***“Cumulative Genomic Divergence (CGD)” as “Evolutionary progression scale”***

370 In Information Theory (Shannon 1948), the Jensen-Shannon Divergence (JSD)  
371 (Lin 1991), bound between zero and one, is commonly used as a measure of the  
372 dissimilarity between two probability distribution of informational features. The FFP as  
373 the descriptor for a linear sequence information of the whole proteome of an organism is  
374 such a probability distribution. Thus, a JSD value of two FFPs, used as a measure of the  
375 information divergence between two proteome sequences, is also bound between 0 and 1,  
376 corresponding to the JSD value between two FFPs of identical whole proteome sequences  
377 and two completely different whole proteome sequences, respectively. Any whole

378 proteome-sequence “dissimilarity” between two extant organisms accumulated during the  
379 evolution can be considered as caused by changes of, ultimately, genomic sequences of  
380 all protein coding genes due to all types of mutational events, such as point substitutions,  
381 insertion/deletion of various lengths, inversion, recombination, loss/gain of genes, etc. as  
382 well as other unknown mechanisms, and they will bring JSD somewhere between 0.0 and  
383 1.0 depending on the degree of the sequence divergence.

384 In this study the collection of the JSDs for all pairs of the study organisms plus 2  
385 out-group members (see Outgroup in Discussions and Implications) constitutes the  
386 “distance matrix” for BIONJ (Saitou & Nei1987; Gascuel 1997). Since all the branch-  
387 lengths are derived from the JSD values, the cumulative branch-length of an internal  
388 node, which we call “cumulative genomic divergence (CGD)” (to reflect the fact that the  
389 proteomic divergence is ultimately derived by the genomic divergence during evolution)  
390 of the node, can be considered as the point of evolutionary stage reached by the node on  
391 an “evolutionary progression scale”. For convenience of assigning the nodes on the  
392 progression scale, CGDs are scaled, as mentioned earlier, such that the CGD value at the  
393 root node of ToIn is set to zero and the leaf nodes of the extant organisms to 100, on  
394 average, corresponding to the fully evolved genomic states of the organisms, which we  
395 define as the beginning and ending point of the “evolutionary progression scale” for the  
396 organisms (see Fig. 3A).

397

398 ***Clustering methods***

399                   We use two unsupervised methods to observe the clustering patterns based solely  
400                   on whole-proteome sequences: Principal Component Analysis (PCA) and t-Distributed  
401                   Stochastic Neighbor Embedding (t-SNE) (R Core Team 2016; v.d. Maaten & Hinton  
402                   2008). Both are dimensional reduction methods, but with different strengths and  
403                   weaknesses for our purposes, which help to visualize any clustering pattern in the data  
404                   distribution. Both are based only on the evolutionary distances (CGD in this study),  
405                   estimated by the divergence of whole-proteome sequences among all pairs of the study  
406                   arthropods. In PCA, the distances within a cluster as well as between two clusters are  
407                   quantitative, thus, two close clusters nearby may not resolve well. In t-SNE, which  
408                   applies Machine Learning to emphasize the resolution of nearby clusters, but the inter-  
409                   cluster distances are de-emphasized, thus, not quantitative.

410

411

## 412 **Declarations**

413

414                   ***Acknowledgement:*** We gratefully acknowledge the comments and advices from the  
415                   arthropod experts at University of California, Berkeley, CA., Profs. Kipling Will and Peter  
416                   Oboyski, and the constructive suggestions on our application of Information Theory and  
417                   Unsupervised Clustering methods from Prof. Se-Ran Jun of College of Medicine,  
418                   University of Arkansas for Medical Sciences, Little Rock, AR, and Dr. Chao Zhang, Chief  
419                   Scientific Officer, of Plexxikon, Inc. All the silhouettes are generated by Rigel Sison.

420

421           **Funding:** This research was partly supported by a grant (to SHK) from World Class  
422           University Project, Ministry of Education, Science and Technology, Republic of Korea  
423           and a gift grant to University of California, Berkeley, CA. (to support JJC). SHK  
424           acknowledges having appointments as Visiting Professorships at Yonsei University,  
425           Korea Advanced Institute of Science and Technology, and Incheon National University  
426           in South Korea during the manuscript preparation.

427

428           **Competing financial interests:** Authors declare that there are no competing financial  
429           interests in connection with this paper.

430

431           **Author contribution:** Conceptual design of the study and speculative interpretations and  
432           implications of the results by SHK; filtering and curation of genomic and proteomic  
433           sequence data from NCBI database, computational-algorithm design, programming and  
434           execution by JJC and BJK; unsupervised clustering by various algorithms were  
435           performed by BJK; interpretation of computational results by SHK, JJC and BJK;  
436           manuscript preparation by SHK with extensive discussions with JJC and BJK; all figures  
437           are designed by SHK, JJC and BJK.

438

439           **Computer code availability:** The FFP programs for this study (2v.3.0) written in  
440           GCC(g++) is available in Github: <https://github.com/jaejinchoi/FFP>.

441

442           **References**

443

- 444 Blaisdell, B. E. (1986). A measure of the similarity of sets of sequences not requiring sequence  
445 alignment. *Proceedings of the National Academy of Sciences of the United States of*  
446 *America*, 83(14), 5155–5159.
- 447 Choi, J.J., & Kim, S.-H. (2017). A genome Tree of Life for the Fungi kingdom. *Proceedings of*  
448 *the National Academy of Sciences*, 114(35), 9391–9396
- 449 Choi, J.J., & Kim, S.-H. (2020). Whole-proteome tree of life suggests a deep burst of organism  
450 diversity. *Proceedings of the National Academy of Sciences*, 117(7), 3678–3686
- 451 Deerwester, S., Dumais, S. T., Furnas, G. W., Landauer, T. K., & Harshman, R. (1990). Indexing  
452 by latent semantic analysis. *Journal of the American Society for Information Science*, 41(6),  
453 391–407.
- 454 Fisher, R. A., & Yates, F. (1948). *Statistical tables for biological, agricultural and medical*  
455 *research*. London: Oliver and Boyd.
- 456 Gascuel, O. (1997). BIONJ: an improved version of the NJ algorithm based on a simple model of  
457 sequence data. *Molecular Biology and Evolution*, 14(7), 685–695.
- 458 Jun, S.-R., Sims, G. E., Wu, G. A., & Kim, S.-H. (2010). Whole-proteome phylogeny of  
459 prokaryotes by feature frequency profiles: An alignment-free method with optimal feature  
460 resolution. *Proceedings of the National Academy of Sciences*, 107(1), 133–138.
- 461 Knuth, D. E. (1973). *Seminumerical algorithms*, in *The art of computer programming* (3rd ed.).  
462 Boston: Addison-Wesley.
- 463 Letunic, I., & Bork, P. (2019). Interactive Tree Of Life (iTOL) v4: Recent updates and new  
464 developments. *Nucleic Acids Research*. 47(W1), W256–W259

- 465 Lin, J. (1991). Divergence measures based on the Shannon entropy. *IEEE Transactions on*  
466 *Information Theory*, 37(1), 145–151.
- 467 Misof, B., Liu, S., Meusemann, K., Peters, R. S. R., Donath, A., Mayer, C., ... Zhou, X. (2014).  
468 Phylogenomics resolves the timing and pattern of insect evolution. *Science*, 346(6210),  
469 763–768.
- 470 O’Leary, N. A., Wright, M. W., Brister, J. R., Ciuffo, S., Haddad, D., McVeigh, R., ... Pruitt, K.  
471 D. (2016). Reference sequence (RefSeq) database at NCBI: Current status, taxonomic  
472 expansion, and functional annotation. *Nucleic Acids Research*, 44(D1), D733–D745.
- 473 Pace, N. R. (2009). Mapping the Tree of Life: Progress and Prospects. *Microbiology and*  
474 *Molecular Biology Reviews*, 73(4), 565–576.
- 475 R Core Team. (2016). *R: A language and environment for statistical computing*. Retrieved from  
476 <https://www.r-project.org/>
- 477 Robinson, D. F., & Foulds, L. R. (1981). Comparison of phylogenetic trees. *Mathematical*  
478 *Biosciences*, 53(1), 131–147.
- 479 Saitou, N., & Nei, M. (1987). The neighbor-joining method: a new method for reconstructing  
480 phylogenetic trees. *Molecular Biology and Evolution*, 4(4), 406–425.
- 481 Shannon, C. (1948). A Mathematical Theory of Communication. *The Bell System Technical*  
482 *Journal*, Vol.27(1948), 379–423.
- 483 Sims, G. E., Jun, S., Wu, G. A., & Kim, S. (2009). Alignment-free genome comparison with  
484 feature frequency profiles (FFP) and optimal resolutions. *Proceedings of the National*  
485 *Academy of Sciences of the United States of America*, 106(8), 2677–2682.

- 486 Thomas, G. W. C., Dohmen, E., Hughes, D. S. T., Murali, S. C., Poelchau, M., Glastad, K., ...  
487 Richards, S. (2020). Gene content evolution in the arthropods. *Genome Biology*, 21(1), 15.  
488 1-14
- 489 Van Der Maaten, L., & Hinton, G. (2008). Visualizing data using t-SNE. *Journal of Machine*  
490 *Learning Research*, 9, 2579–2605.
- 491 Zielezinski, A., Girgis, H. Z., Bernard, G., Leimeister, C.-A., Tang, K., Dencker, T., ...  
492 Karlowski, W. M. (2019). Benchmarking of alignment-free sequence comparison methods.  
493 *Genome Biology*, 20(1), 144. 1–18
- 494 Zielezinski, A., Vinga, S., Almeida, J., & Karlowski, W. M. (2017, October 3). Alignment-free  
495 sequence comparison: benefits, applications, and tools. *Genome Biology*, Vol. 18, pp. 1–17.

496

## 497 **Figure legends**

498

499 **Fig. 1: Unsupervised clustering (grouping) of 134 extant arthropods (123 insects plus**  
500 **11 non-insect arthropods) by classical PCA**

501 Classical PCA plotted for the three principal axes reveals about 5 large clusters arranged  
502 in 5-spokes. Two long spokes (IV and V) corresponds to all the members of Diptera and  
503 Hymenoptera, respectively. The remaining three short spokes (I, II, and III) correspond  
504 to: Members of Chelicerata and Crustacea in spoke I; those of Hemiptera-A and  
505 Lepidoptera in spoke II, and those of Hemiptera-B, Coleoptera, and Blattodea in spoke III.

506

507 **Fig. 2: Topology of the linear representation of whole-proteome Tree of Insects (ToIn)**

508 The colors of the first (inner) colored-band distinguish organisms in different Classes, and  
509 those of the second (outer) band among different Orders (the names of different color-  
510 bands are shown in Fig. 3A). Scientific names and common names, when available, of  
511 each organism are also listed. The silhouettes of sampled organisms are shown next to  
512 their names. To emphasize the clading pattern, all branch-lengths are ignored. The first  
513 two items refer to two members of the outgroup (see Outgroup in Discussions and  
514 Implications) constructed by shuffling (Knuth 1973; Fisher & Yates 1948) the whole-  
515 proteome sequences of the two arthropods. The visualization of the ToIn was made using  
516 iTOL (Letunic & Bork 2019).

517

518 **Fig. 3A: “Pie” representation of whole-proteome ToIn with the cumulative branch-**  
519 **lengths scale.**

520 This view of the whole-proteome ToIn shows all branch-lengths to emphasizes the  
521 progression of evolution of each member in the study population from the root of the tree  
522 at CGD = 0 to the extant forms of the members at CGD = 100, on average. The small red  
523 arc near the root is at CGD=5.8, by which point of the evolutionary progression the  
524 founders of all major groups (consisting of 7 Order groups and 2 Subphylum groups  
525 shown in Fig. 1) have emerged, suggesting that the remaining 94.2 on CGD scale  
526 corresponds to further diversification and gradual evolution of the founders and common  
527 ancestors *within* each major group toward their extant forms. The visualization of the  
528 ToIn was made using iTOL (Letunic & Bork 2019).

529

530 **Fig. 3B: Expanded view of Fig. 3A near the root of the whole-proteome ToIn**



531 Examples of the founders of all major groups are shown as blue dots, and the common  
532 ancestors of extant groups within two major groups, Diptera and Hymenoptera, as red  
533 dots. The visualization of the ToIn was made using iTOL (Letunic & Bork 2019).

534

535 **Fig. 4: Simplified whole-proteome ToIn**

536 The vertical axis shows cumulative genomic divergence (CGD) values, which ranges from  
537 zero to around 100, and they correspond to the extent of evolutionary progression from the  
538 root of the ToIn to the extant leaves. For simplicity, “singletons” (that do not belong to  
539 any named groups) are not shown, and all the leaf nodes and their branches of a common-  
540 named group (in parenthesis) are combined into a single dotted line coming out from their  
541 common ancestor node of the extant group shown as a blue sphere. Each internal node  
542 represents a “pool of founding ancestors” (see Supplementary Information Fig. S3).

543 Dotted vertical lines are to indicate that they are arbitrarily shortened to accommodate  
544 large jumps of CGD values within a limited space of the figure. The double-headed arrow  
545 at bottom right indicates the short range of the CGD values, within which the founders of  
546 all the major groups of the extant organisms in this study have emerged in a “burst”. For  
547 our interpretation of horizontal lines and vertical lines, see Supplementary Information  
548 Fig. S3.

549

Fig. 1

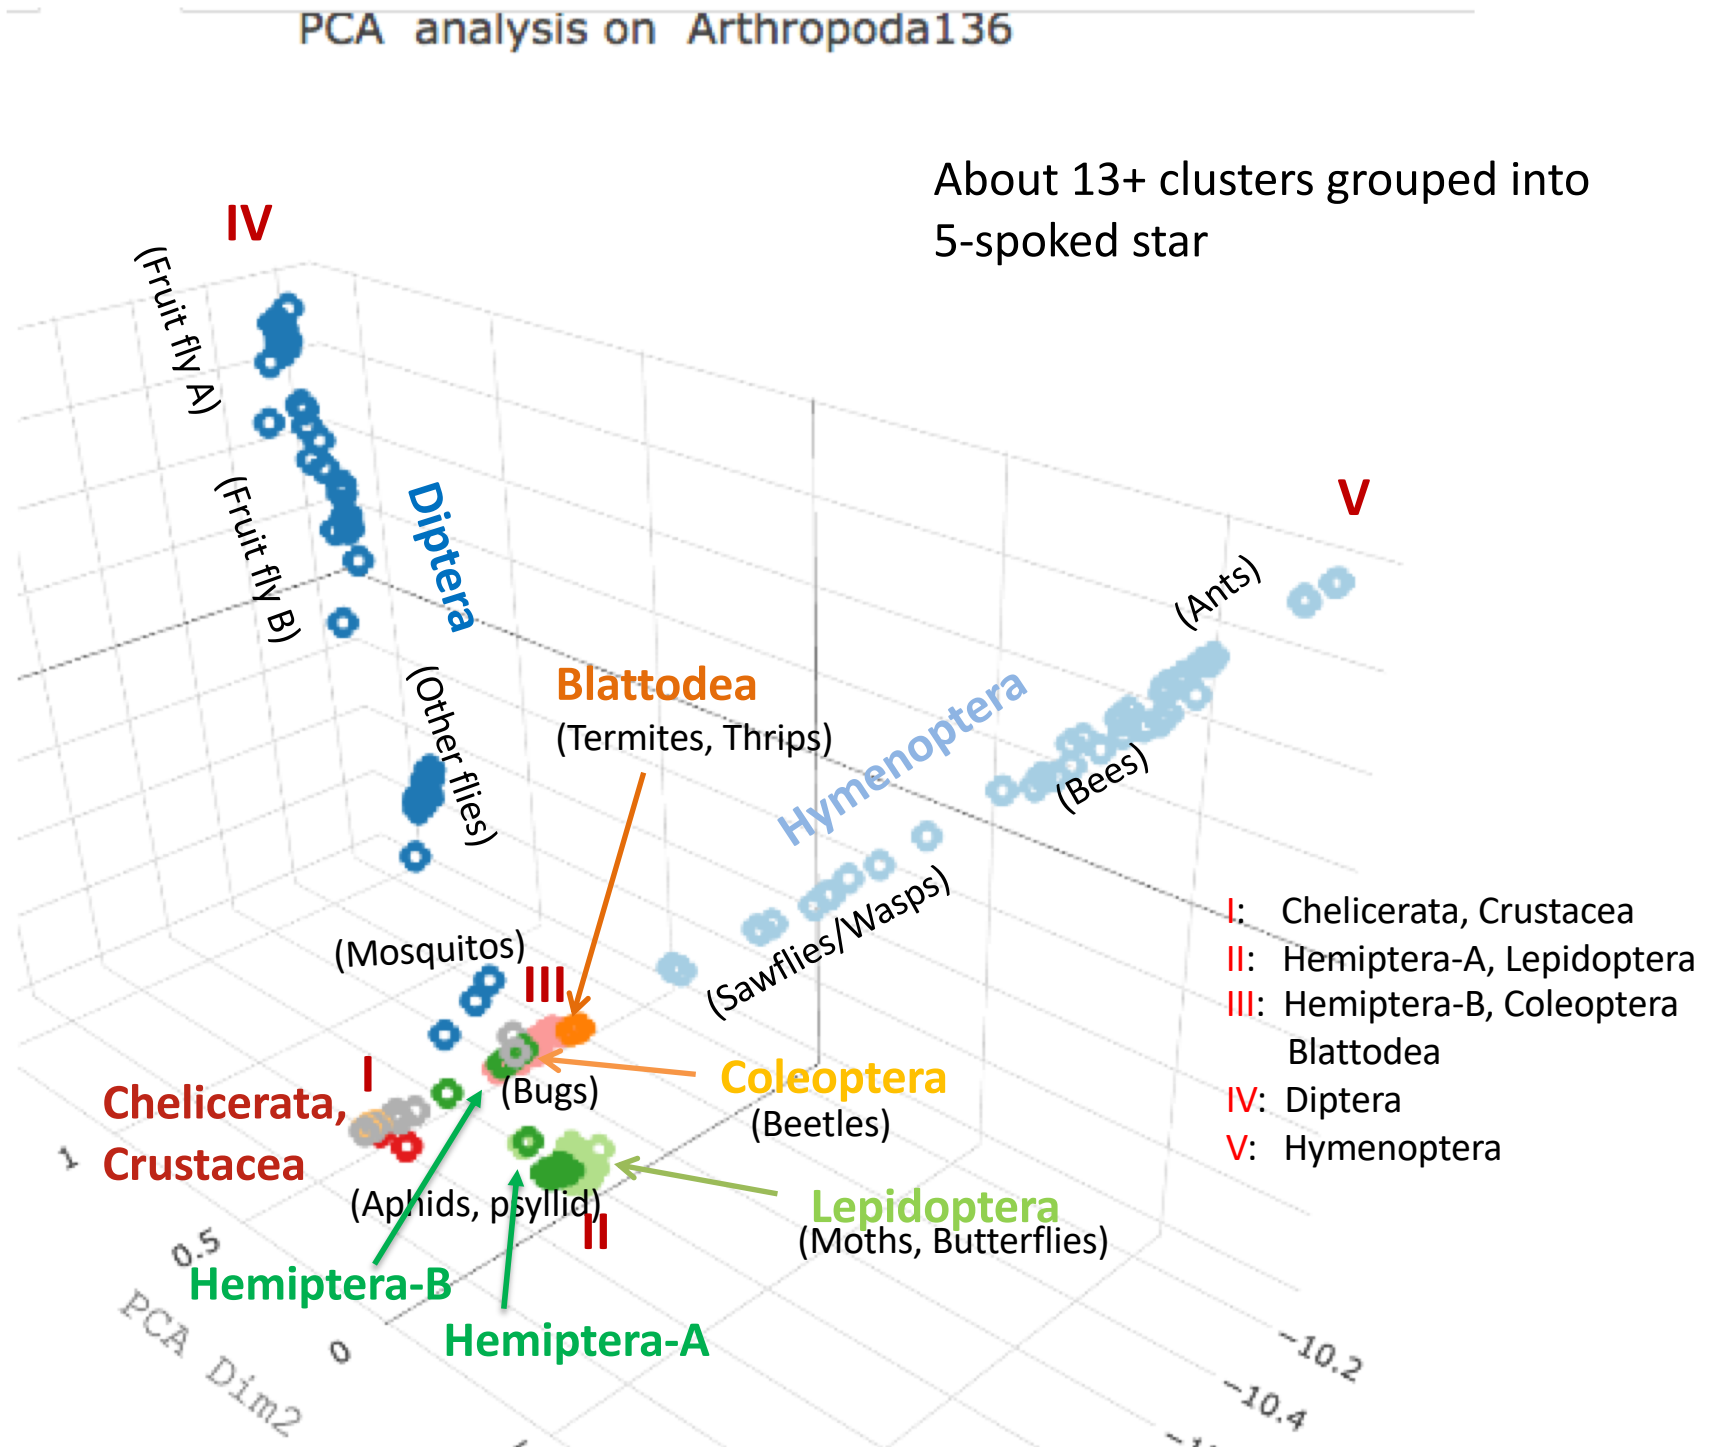

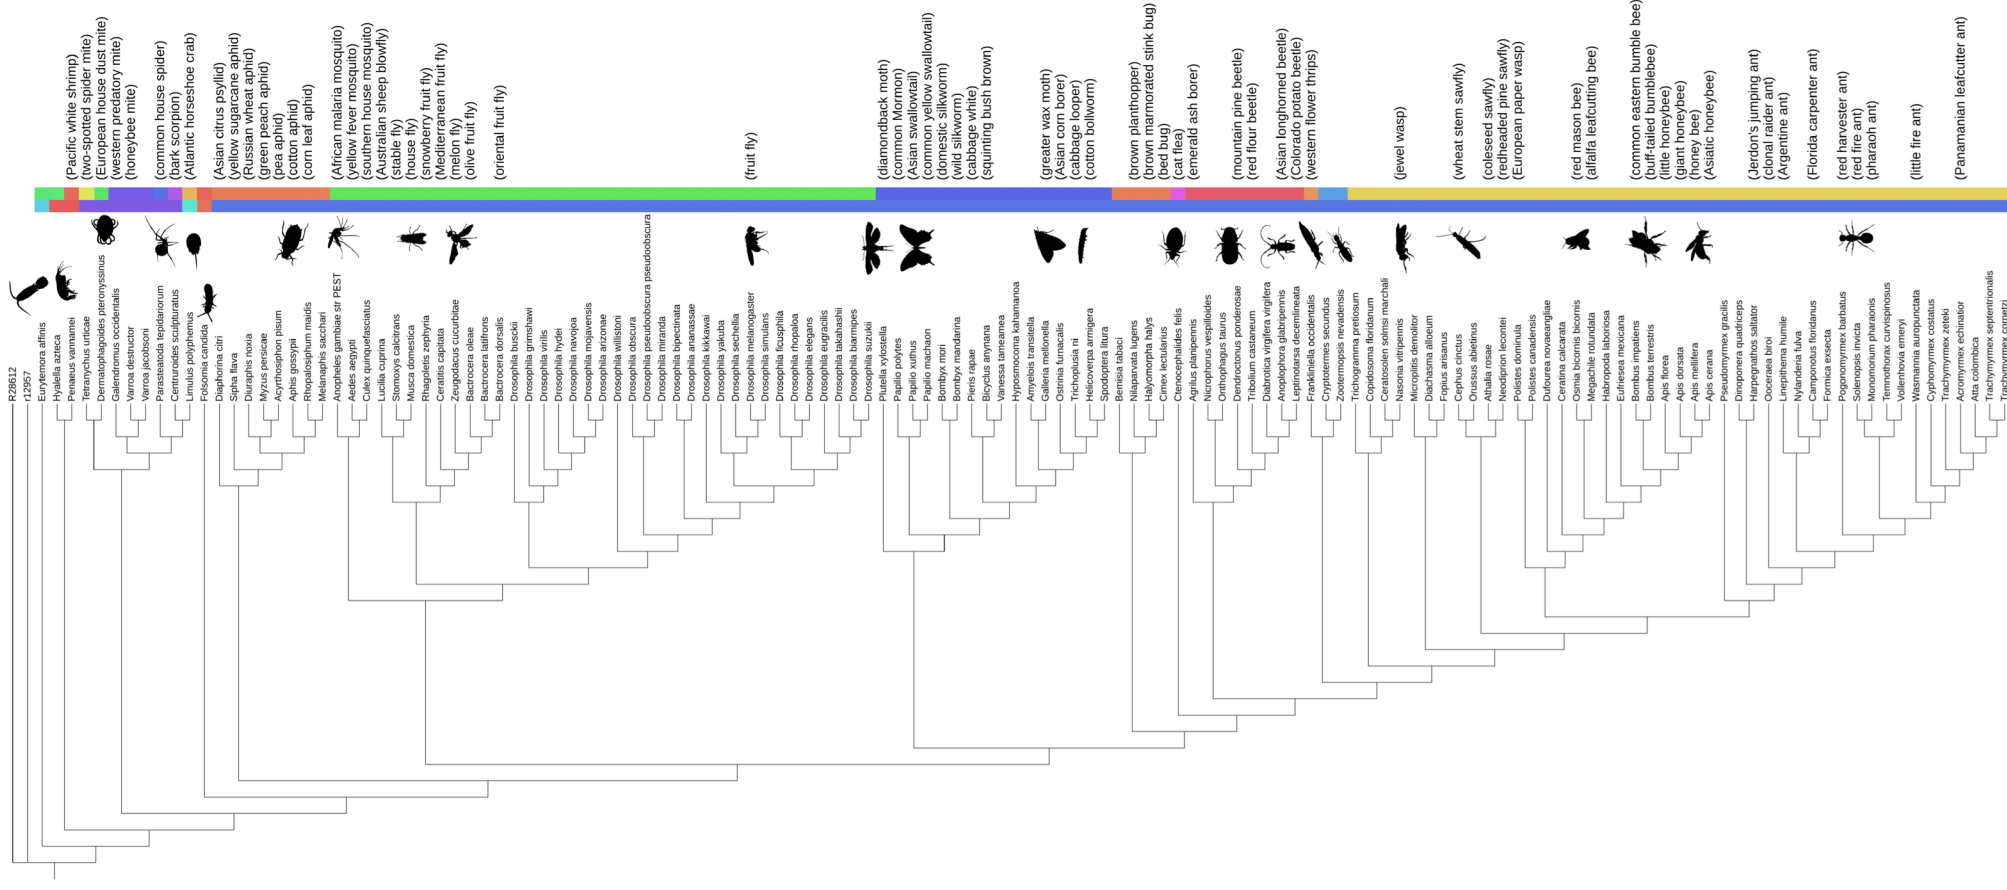

Fig. 2

Fig. 3A.

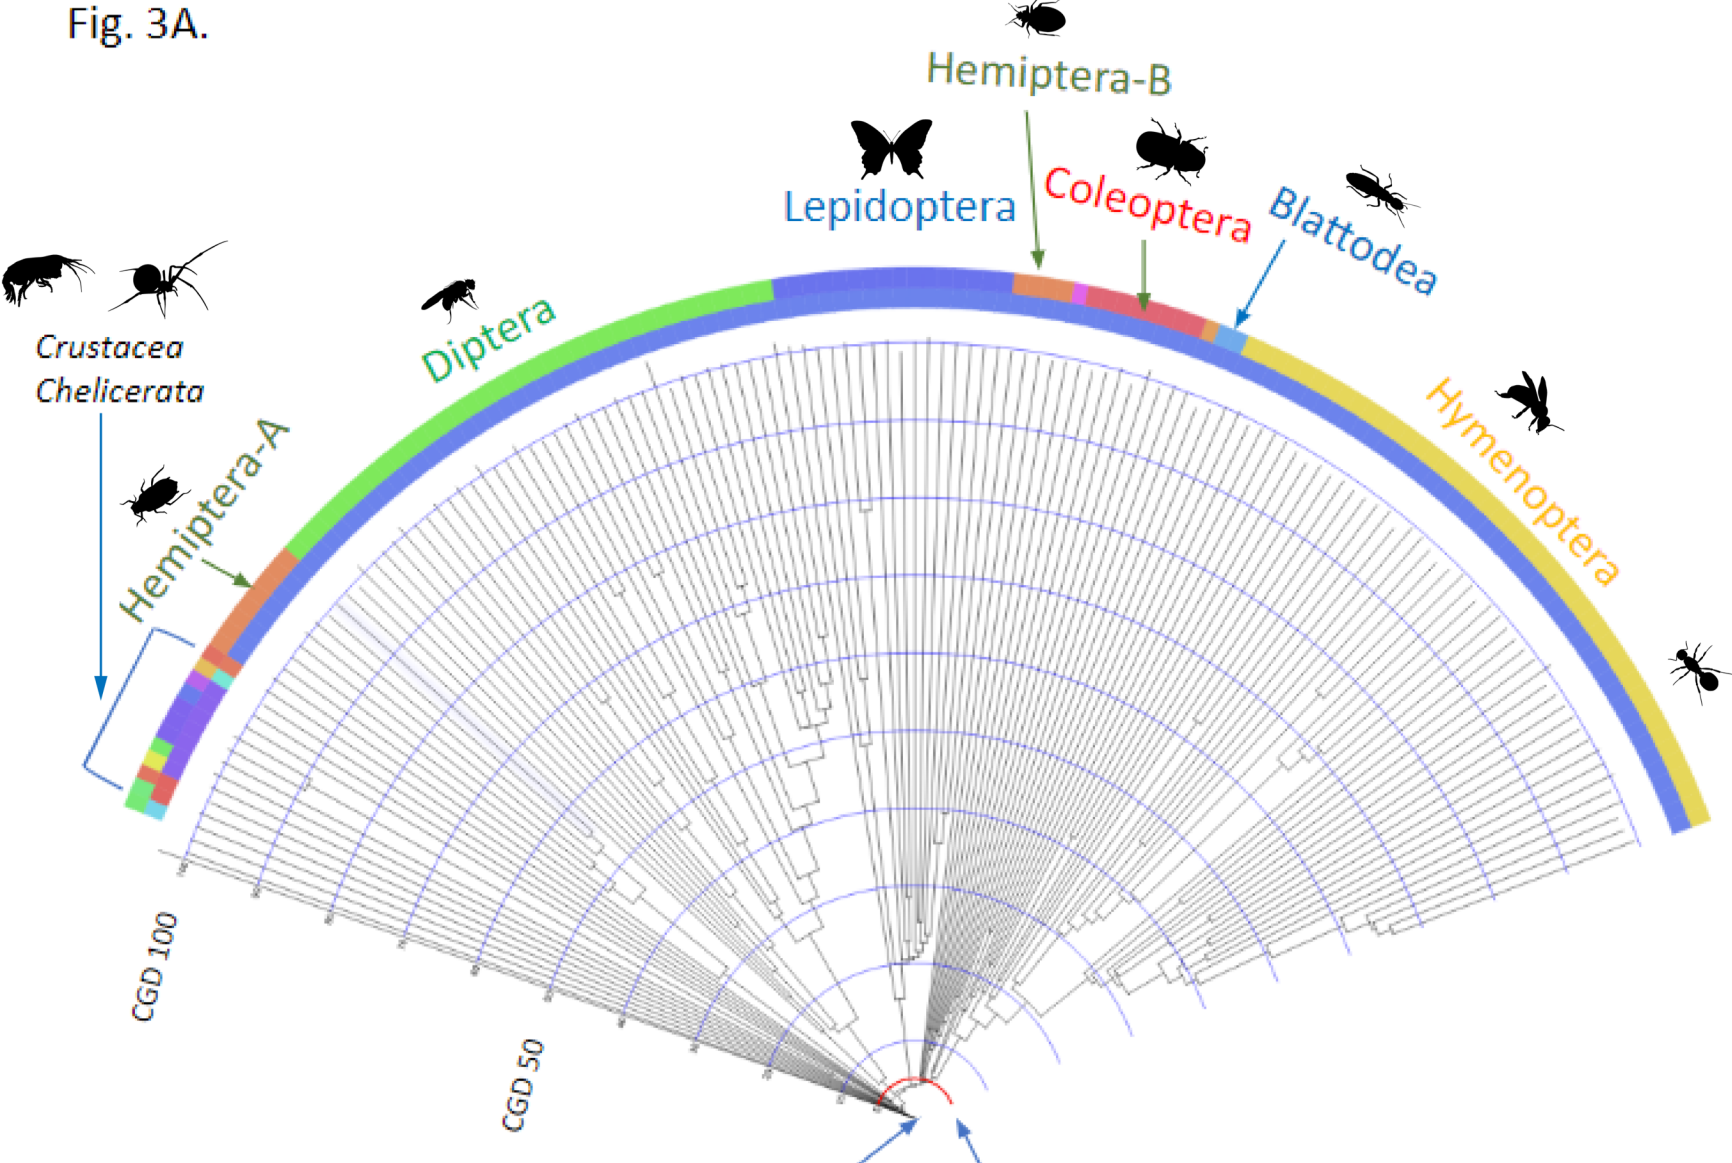

Origin of Arthropods  
CGD: 0.0

“Arthropodal Burst”: Emergence of the founders of  
all *extant* arthropod major groups  
CGD: 5.8

Fig. 3B.

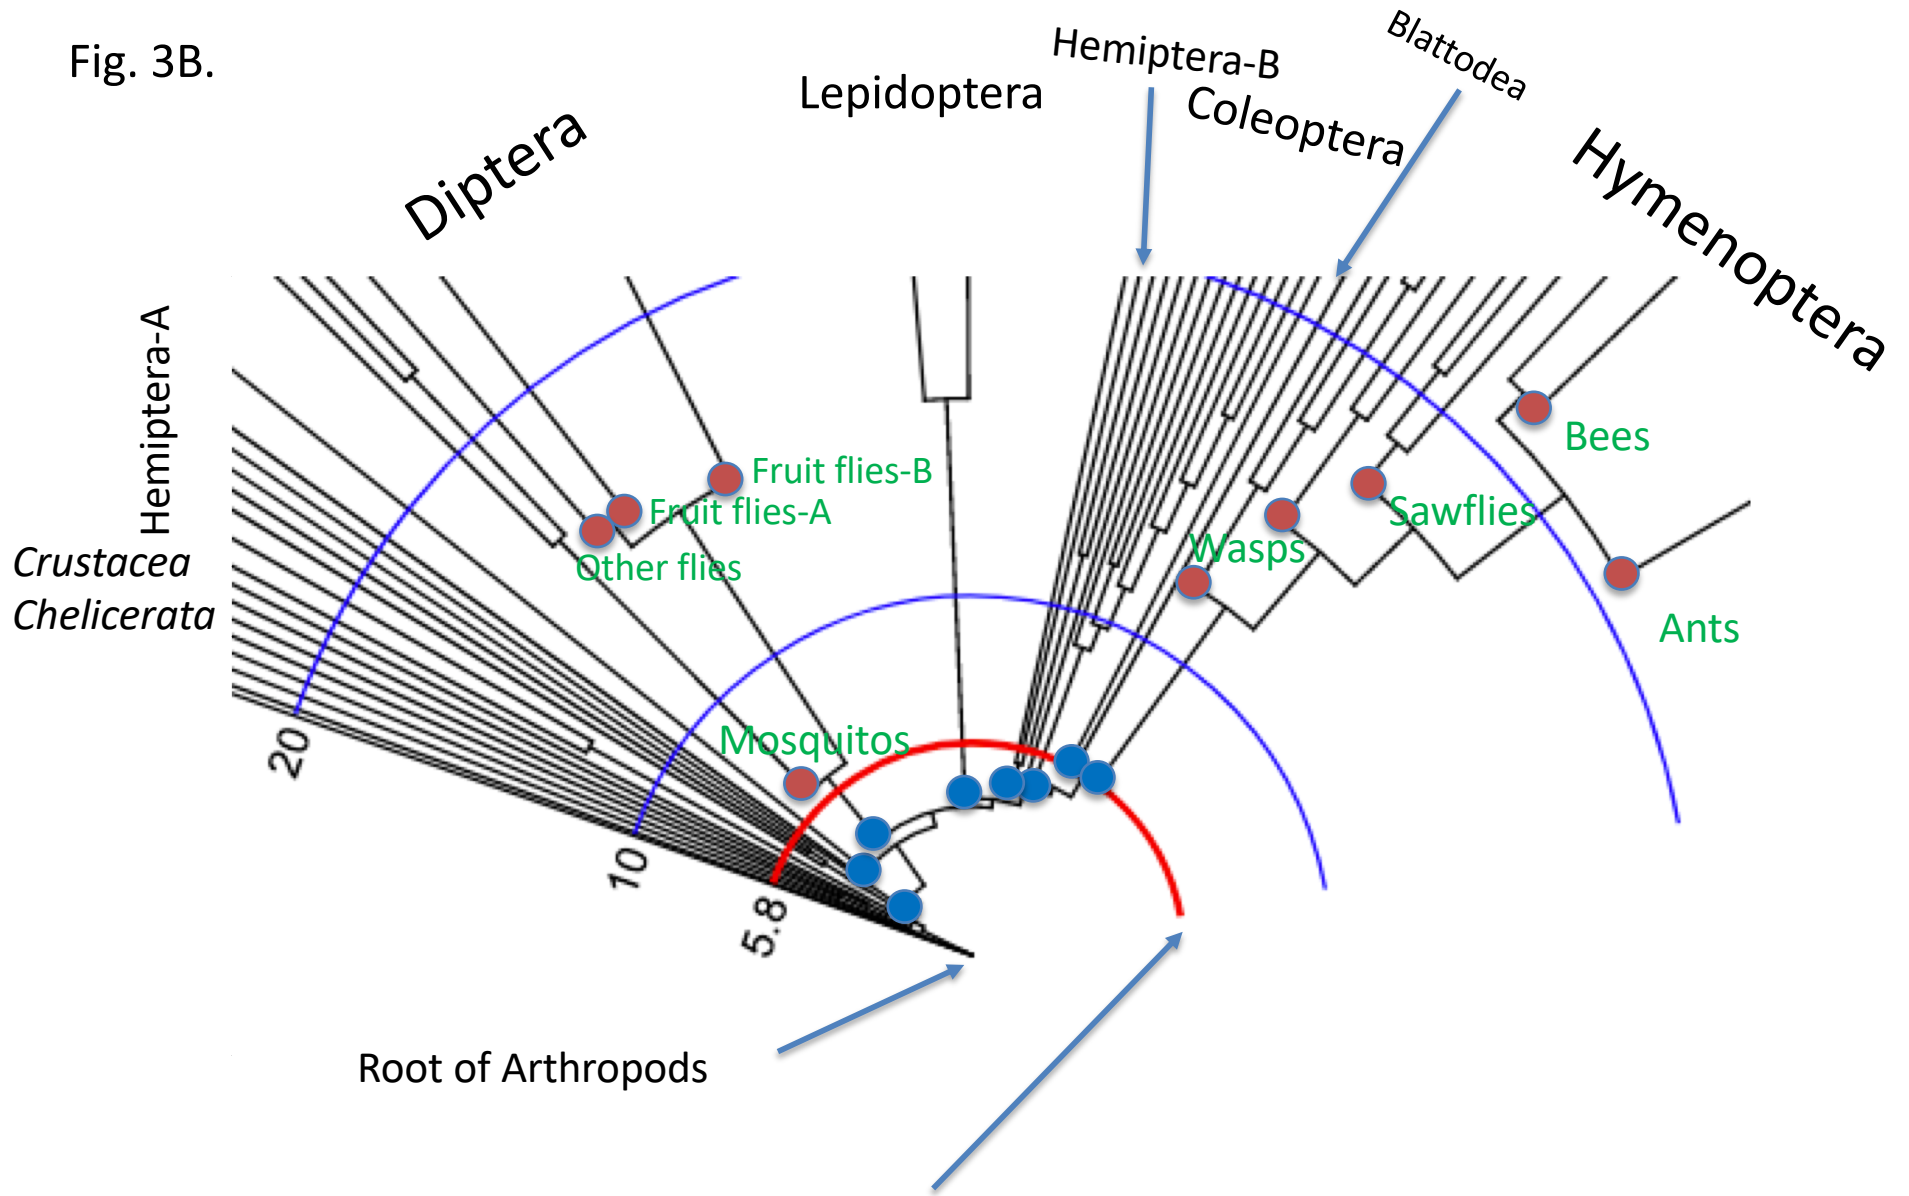

“Arthropodal Burst”: ● Emergence of the founders of all extant major groups (Subphyla Crustacea and Chelicerata, and all Order groups of Hexapoda); ● Emergence of the founders of common-named groups in Diptera and Hymenoptera, two largest groups

Fig. 4

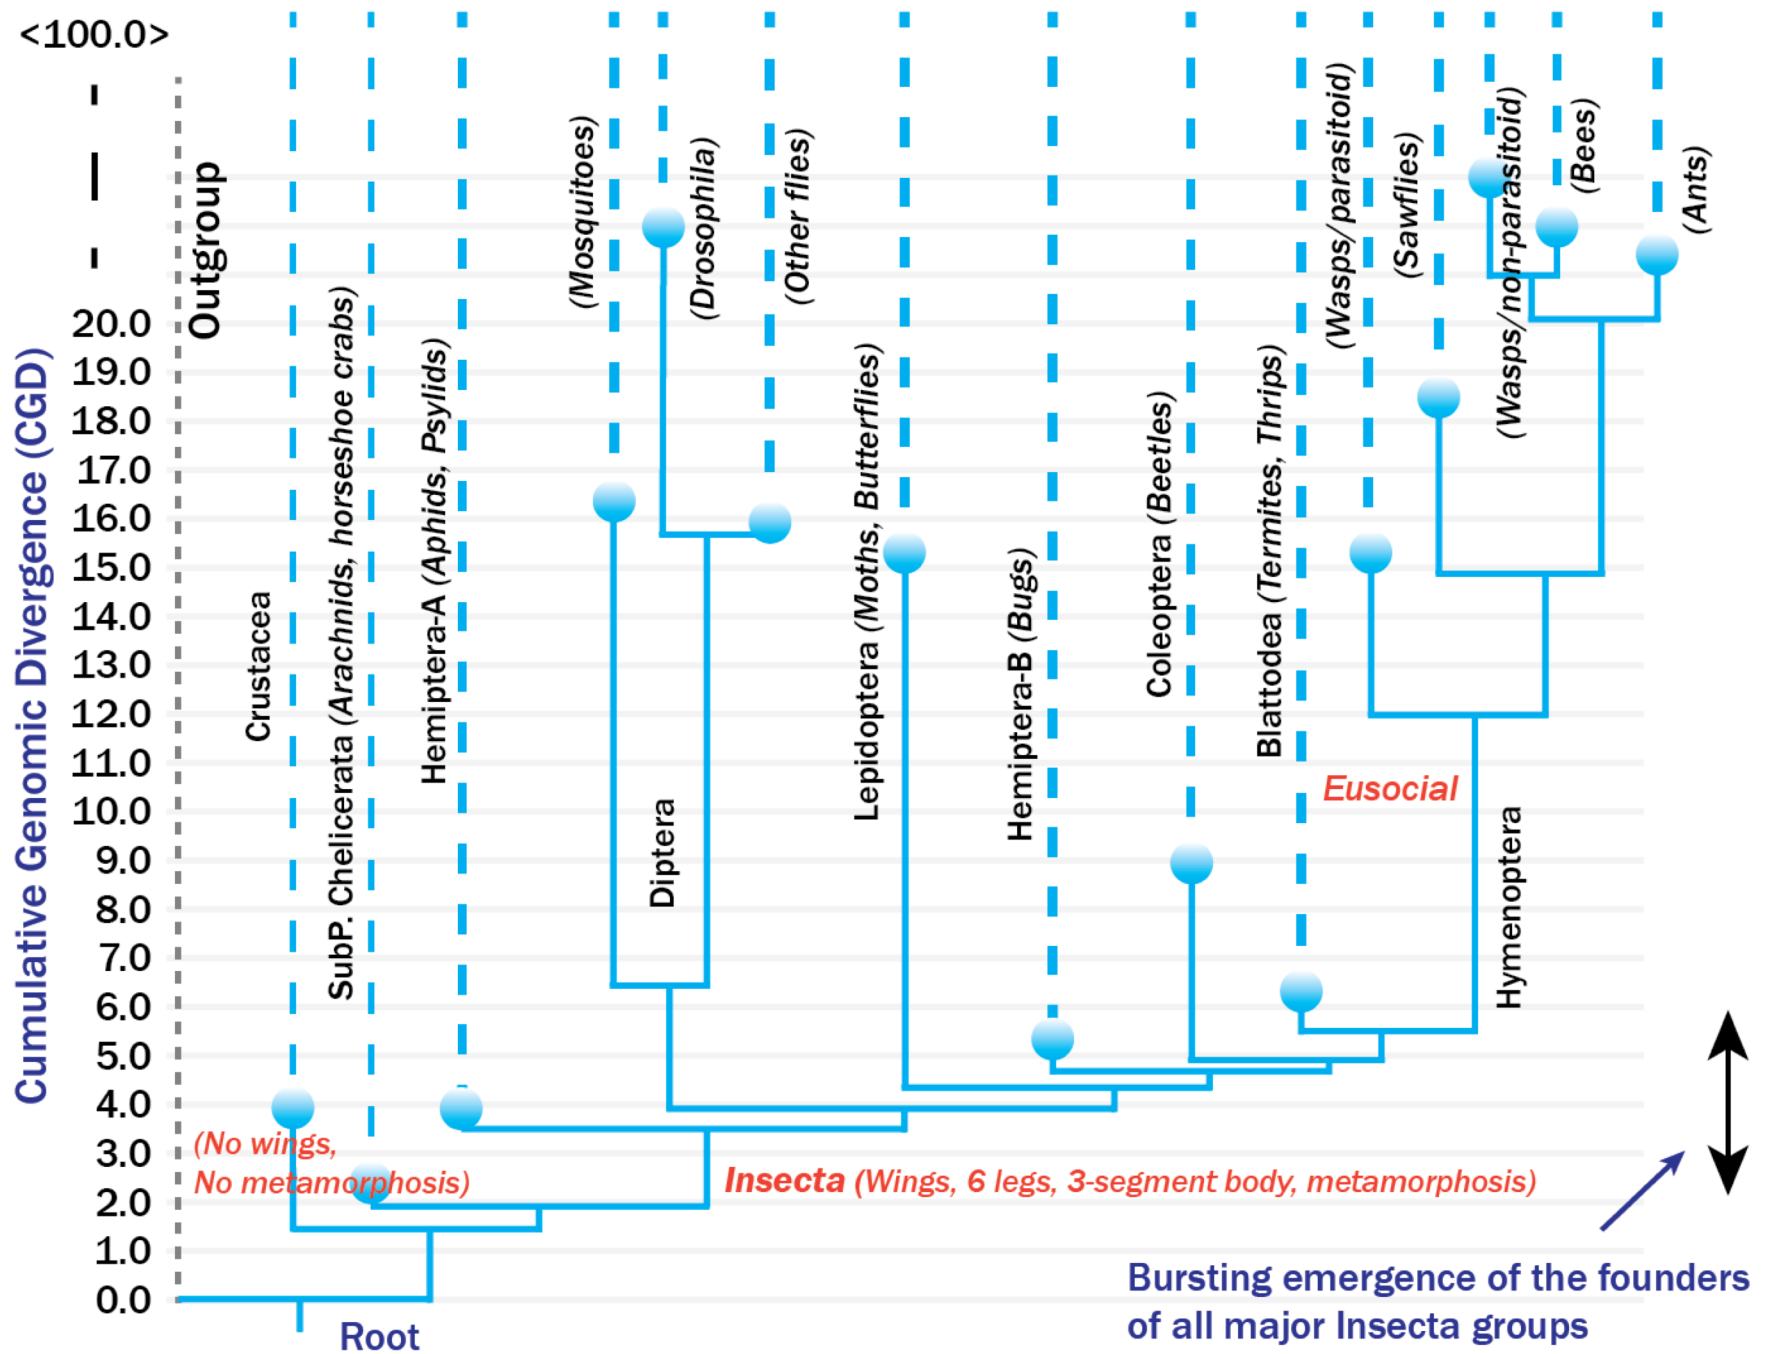

Source: https://www.biorxiv.org/content/10.1101/2020.07.11.198689v4.full.pdf
